# Supplementary material
Source: PubMed Central journal article supplement (PMC4718881)

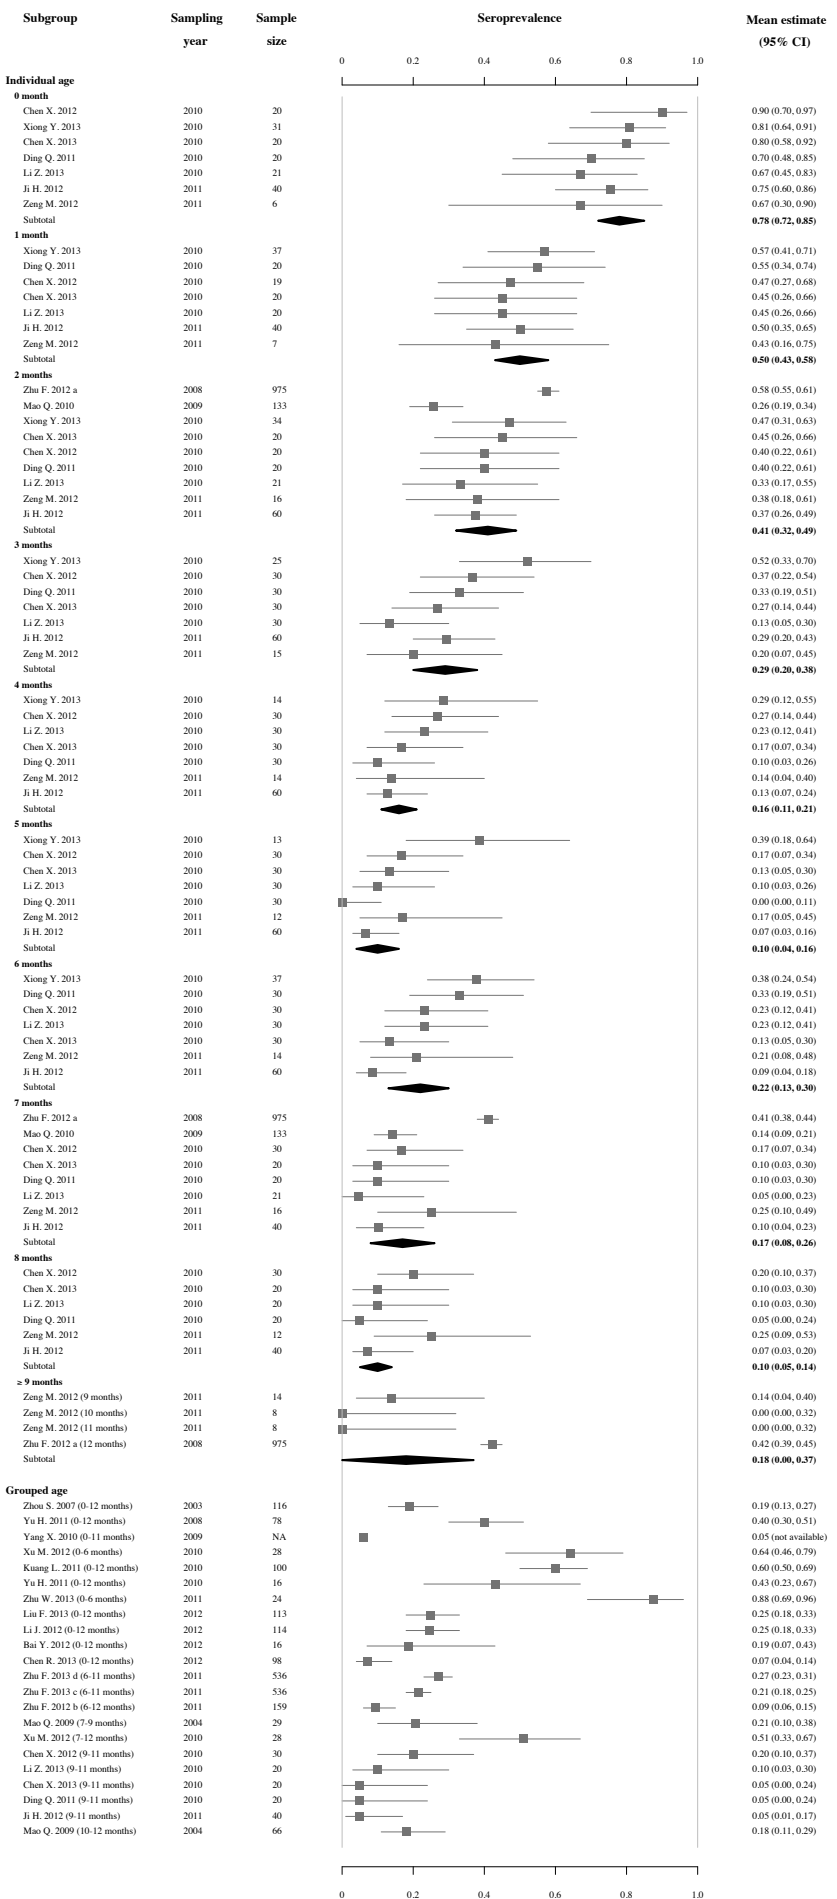

Supplement: NIHMS722009-supplement-App__Figure_1.pdf [file NIHMS722009-supplement-App__Figure_1.pdf]

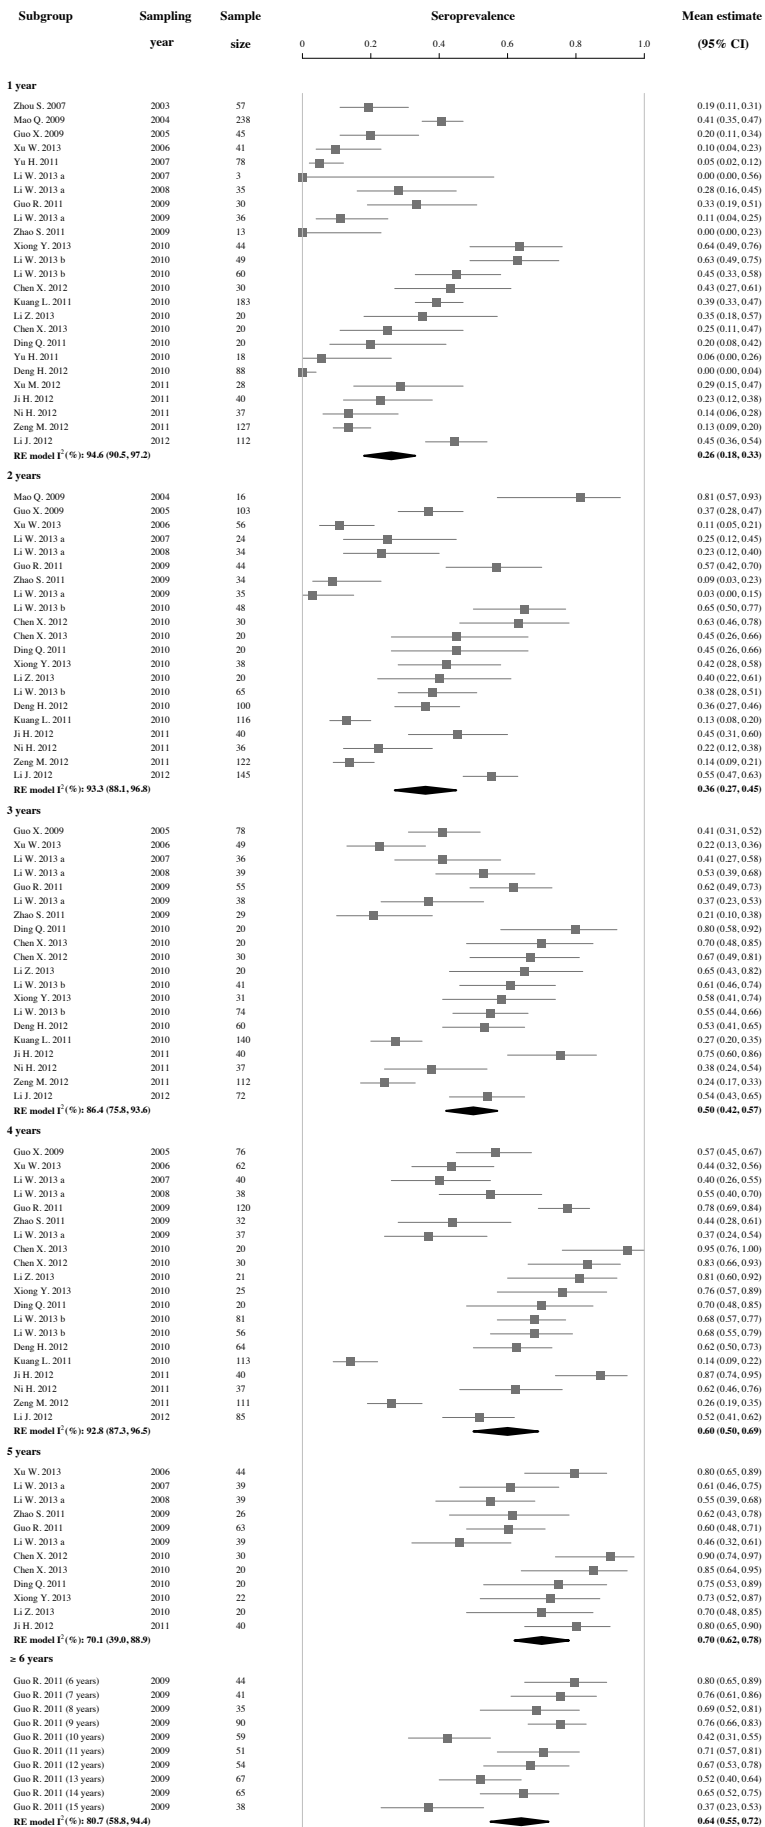

Supplement: NIHMS722009-supplement-App__Figure_2.pdf [file NIHMS722009-supplement-App__Figure_2.pdf]

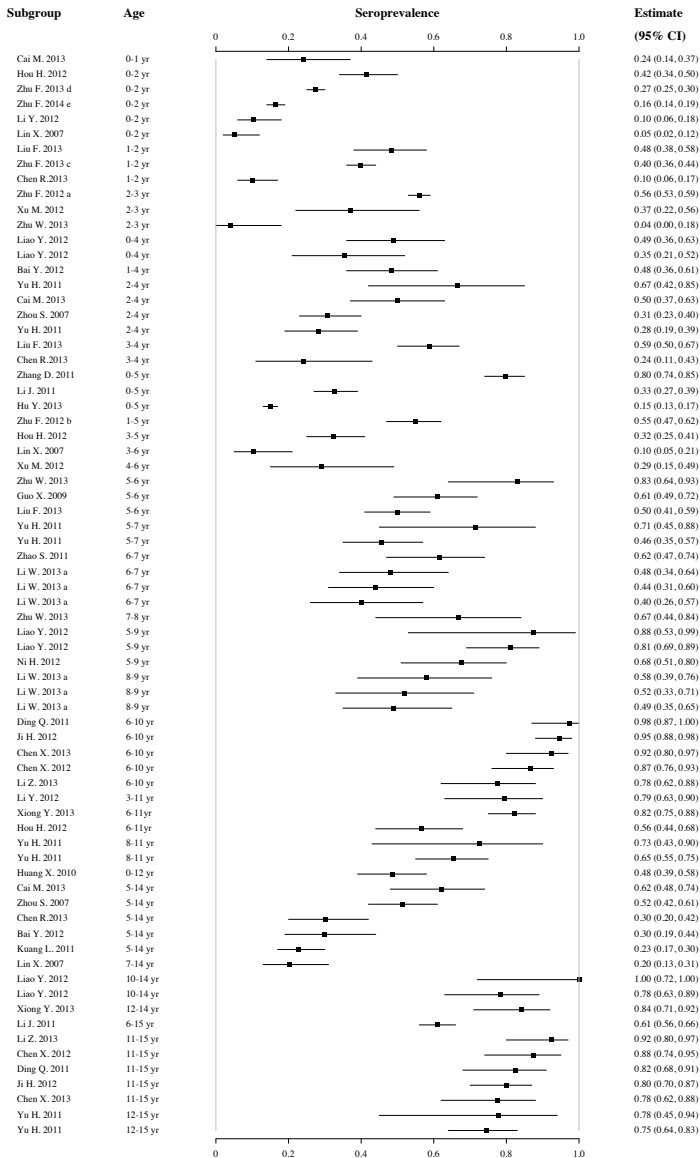

Supplement: NIHMS722009-supplement-App__Figure_3.pdf [file NIHMS722009-supplement-App__Figure_3.pdf]
